# Supplementary material
Source: PubMed Central journal article supplement (PMC4793681)
Supplement: farm016965.wt1_default.pdf [file farm016965.wt1_default.pdf]

**Table S1. Relative risk and 95% confidence intervals for breast cancer according to fifths of total iron and heme iron intakes in 1991 among women in the Nurses' Health Study II**

|                           | Fifths of intake |                       |                       |                       |                     | P <sub>trend*</sub> |
|---------------------------|------------------|-----------------------|-----------------------|-----------------------|---------------------|---------------------|
|                           | Lowest fifth     | 2 <sup>nd</sup> fifth | 3 <sup>rd</sup> fifth | 4 <sup>th</sup> fifth | Highest fifth       |                     |
| <b>Iron</b>               |                  |                       |                       |                       |                     |                     |
| All women:                |                  |                       |                       |                       |                     |                     |
| Median intake, mg/day     | 10.2             | 12.2                  | 14.5                  | 21.7                  | 50.9                |                     |
| No. of cases/person-years | 600/338 237      | 553/345 934           | 586/350 301           | 576/345 612           | 515/345 335         |                     |
| Age adjusted model        | 1                | 0.87 (0.78 to 0.98)   | 0.92 (0.82 to 1.03)   | 0.94 (0.84 to 1.05)   | 0.90 (0.80 to 1.01) | 0.44                |
| Multivariable model       | 1                | 0.86 (0.77 to 0.97)   | 0.90 (0.80 to 1.01)   | 0.90 (0.80 to 1.01)   | 0.85 (0.75 to 0.96) | 0.09                |
| Premenopausal women:      |                  |                       |                       |                       |                     |                     |
| Median intake, mg/day     | 10.2             | 12.2                  | 14.5                  | 21.7                  | 50.9                |                     |
| No. of cases/person-years | 315/216 640      | 295/213 074           | 326/215 428           | 314/214 786           | 261/215 054         |                     |
| Age adjusted model        | 1                | 0.93 (0.79 to 1.09)   | 1.02 (0.88 to 1.19)   | 1.02 (0.87 to 1.19)   | 0.92 (0.78 to 1.08) | 0.32                |
| Multivariable model       | 1                | 0.93 (0.79 to 1.09)   | 1.01 (0.86 to 1.18)   | 0.99 (0.84 to 1.16)   | 0.88 (0.74 to 1.04) | 0.13                |
| Postmenopausal women:     |                  |                       |                       |                       |                     |                     |
| Median intake, mg/day     | 10.2             | 12.1                  | 14.2                  | 20.0                  | 44.4                |                     |
| No. of cases/person-years | 209/86 535       | 165/85 433            | 183/86 157            | 179/86 110            | 182/86 113          |                     |
| Age adjusted model        | 1                | 0.78 (0.64 to 0.96)   | 0.86 (0.70 to 1.05)   | 0.85 (0.70 to 1.04)   | 0.89 (0.72 to 1.08) | 0.94                |
| Multivariable model       | 1                | 0.77 (0.62 to 0.94)   | 0.83 (0.68 to 1.01)   | 0.82 (0.67 to 1.00)   | 0.83 (0.68 to 1.01) | 0.51                |
| <b>Heme Iron</b>          |                  |                       |                       |                       |                     |                     |
| All women:                |                  |                       |                       |                       |                     |                     |
| Median intake, mg/day     | 0.6              | 0.9                   | 1.0                   | 1.3                   | 1.6                 |                     |
| No. of cases/person-years | 431/278 936      | 583/338 794           | 566/358 197           | 663/403 205           | 587/346 287         |                     |
| Age adjusted model        | 1                | 1.12 (0.99 to 1.27)   | 1.01 (0.89 to 1.15)   | 1.04 (0.92 to 1.17)   | 1.05 (0.93 to 1.19) | 0.85                |
| Multivariable model       | 1                | 1.14 (1.00 to 1.29)   | 1.04 (0.92 to 1.18)   | 1.08 (0.95 to 1.22)   | 1.12 (0.99 to 1.28) | 0.17                |
| Premenopausal women:      |                  |                       |                       |                       |                     |                     |
| Median intake, mg/day     | 0.6              | 0.9                   | 1.0                   | 1.3                   | 1.6                 |                     |
| No. of cases/person-years | 238/178 396      | 332/218 961           | 303/225 342           | 326/243 712           | 312/208 571         |                     |
| Age adjusted model        | 1                | 1.13 (0.96 to 1.34)   | 0.99 (0.84 to 1.18)   | 1.00 (0.85 to 1.18)   | 1.07 (0.91 to 1.27) | 0.81                |
| Multivariable model       | 1                | 1.16 (0.98 to 1.37)   | 1.03 (0.87 to 1.23)   | 1.06 (0.89 to 1.26)   | 1.15 (0.97 to 1.37) | 0.26                |
| Postmenopausal women:     |                  |                       |                       |                       |                     |                     |
| Median intake, mg/day     | 0.7              | 0.9                   | 1.1                   | 1.3                   | 1.7                 |                     |
| No. of cases/person-years | 219/99 143       | 191/89 412            | 184/84 160            | 130/64 575            | 194/93 058          |                     |
| Age adjusted model        | 1                | 0.96 (0.79 to 1.17)   | 0.99 (0.81 to 1.21)   | 0.90 (0.73 to 1.12)   | 0.94 (0.78 to 1.14) | 0.50                |
| Multivariable model       | 1                | 0.96 (0.79 to 1.17)   | 1.00 (0.82 to 1.22)   | 0.91 (0.73 to 1.13)   | 0.96 (0.79 to 1.17) | 0.66                |

\*Calculated with median intake of each variable in each fifth as continuous variable.

Multivariable model was stratified by age in months at start of follow-up and calendar year of current questionnaire cycle and was simultaneously adjusted for race (white, non-white), family history of breast cancer in mother or sisters (yes, no), history of benign breast disease (yes, no), smoking (never, former, current 1-14/day, current 15-24/day, current

≥25/day), height (<157.5, 157.5 to <165, 165 to <173, ≥173 cm), body mass index (<18.5, 18.5 to <20.0, 20.0 to <22.5, 22.5 to <25.0, 25.0 to <30.0, 30 to <35.0, ≥35.0 kg/m<sup>2</sup>), age at menarche (<12, 12, 13, ≥14 years), parity and age at first birth (nulliparous, parity ≤2 and age at first birth <25 years, parity ≤2 and age at first birth 25 to <30 years, parity ≤2 and age at first birth ≥30 years, parity 3-4 and age at first birth <25 years, parity 3-4 and age at first birth 25 to <30 years, parity 3-4 and age at first birth ≥30 years, parity ≥5 and age at first birth <25 years, parity ≥5 and age at first birth ≥25 years), oral contraceptive use (never, former, current), alcohol intake (non-drinker, <5, 5 to <15, ≥15 g/day), and energy (fifth). In postmenopausal women, we additionally adjusted for postmenopausal hormone use (never users, former users, current users) and age at menopause (<45 years, 45-46 years, 47-48, 49-50 years, 51-52 years, ≥53 years). Among all women, we additionally adjusted for hormone use and menopausal status (premenopausal, postmenopausal never users, postmenopausal former users, postmenopausal current users, unknown menopausal status), and age at menopause (premenopausal, unknown menopause, <45 years, 45-46 years, 47-48, 49-50 years, 51-52 years, ≥53 years).

**Table S2: Multivariable\* relative risk and 95% confidence intervals of subtypes of breast cancer according to total red meat intake among women in the Nurses' Health Study II**

| Breast cancer subtype                       | Total red meat, per 1 serving/day |                              |                     |                              |                      |                              |
|---------------------------------------------|-----------------------------------|------------------------------|---------------------|------------------------------|----------------------|------------------------------|
|                                             | All women                         |                              | Premenopausal women |                              | Postmenopausal women |                              |
|                                             | No. of cases                      | RR (95% confidence interval) | No. of cases        | RR (95% confidence interval) | No. of cases         | RR (95% confidence interval) |
| Estrogen and progesterone receptor positive | 1544                              | 1.19 (1.08 to 1.32)          | 815                 | 1.23 (1.07 to 1.40)          | 513                  | 1.17 (0.98 to 1.39)          |
| Estrogen and progesterone receptor negative | 423                               | 1.13 (0.94 to 1.35)          | 237                 | 1.10 (0.86 to 1.40)          | 136                  | 0.99 (0.71 to 1.38)          |
| P for Heterogeneity                         |                                   | 0.56                         |                     | 0.40                         |                      | 0.36                         |

\*Multivariable model was stratified by age in months at start of follow-up and calendar year of current questionnaire cycle and was simultaneously adjusted for race (white, non-white), family history of breast cancer in mother or sisters (yes, no), history of benign breast disease (yes, no), smoking (never, former, current 1-14/day, current 15-24/day, current  $\geq 25$ /day), height (<157.5, 157.5 to <165, 165 to <173,  $\geq 173$  cm), body mass index (<18.5, 18.5 to <20.0, 20.0 to <22.5, 22.5 to <25.0, 25.0 to <30.0, 30 to <35.0,  $\geq 35.0$  kg/m<sup>2</sup>), age at menarche (<12, 12, 13,  $\geq 14$  years), parity and age at first birth (nulliparous, parity  $\leq 2$  and age at first birth <25 years, parity  $\leq 2$  and age at first birth 25 to <30 years, parity  $\leq 2$  and age at first birth  $\geq 30$  years, parity 3-4 and age at first birth <25 years, parity 3-4 and age at first birth 25 to <30 years, parity 3-4 and age at first birth  $\geq 30$  years, parity  $\geq 5$  and age at first birth <25 years, parity  $\geq 5$  and age at first birth  $\geq 25$  years), oral contraceptive use (never, former, current), alcohol intake (non-drinker, <5, 5 to <15,  $\geq 15$  g/day), and energy (fifth). In postmenopausal women, we additionally adjusted for postmenopausal hormone use (never users, former users, current users) and age at menopause (<45 years, 45-46 years, 47-48, 49-50 years, 51-52 years,  $\geq 53$  years). Among all women, we additionally adjusted for hormone use and menopausal status (premenopausal, postmenopausal never users, postmenopausal former users, postmenopausal current users, unknown menopausal status), and age at menopause (premenopausal, unknown menopause, <45 years, 45-46 years, 47-48, 49-50 years, 51-52 years,  $\geq 53$  years).
